# Supplementary material
Source: publisher site journal article supplement (https://www.dovepress.com/article/462734)
Supplement: Supplementary file 1 [file get_supplementary_file.php]

# Supplementary file

**Figure S1. T ample size of 103 areas (17 cities)**

**Figure S2. Sampling steps**

**Figure S3. Distribution of sunshine in 103 county-level administrative districts in Hubei Province**

**Figure S4. Development of SER and prevalence by grade**

**Table S1. Geographic and social information of 103 survey site**

**Table S2. Demographic information**

**Table S3. Geographic division of Hubei**

**Table S4. Comparison of Variables associated with the establishment of myopia**

**Table S5. Comparison of SD under different geographic conditions**

**Table S6. Global spatial analysis of geographic data and SD**

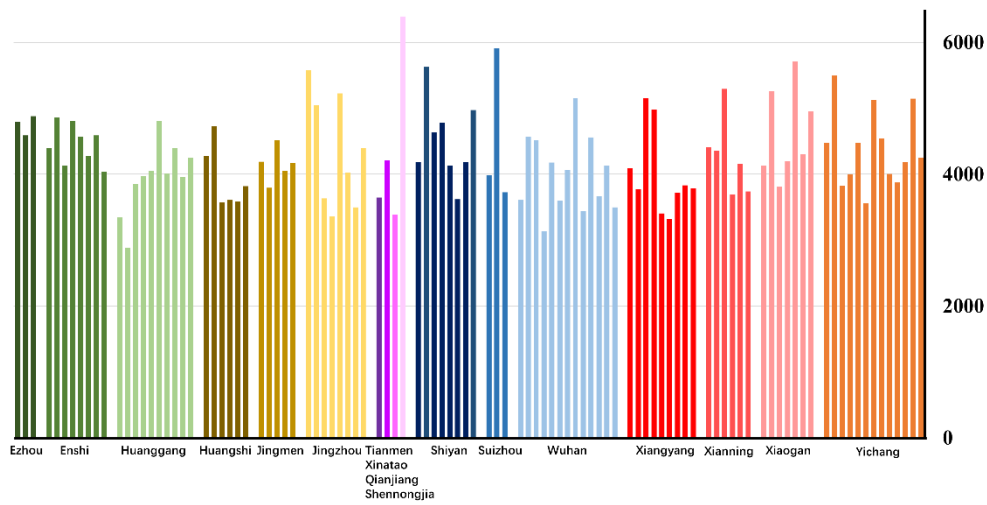

Figure S1 Sample size of 103 areas (17 cities).

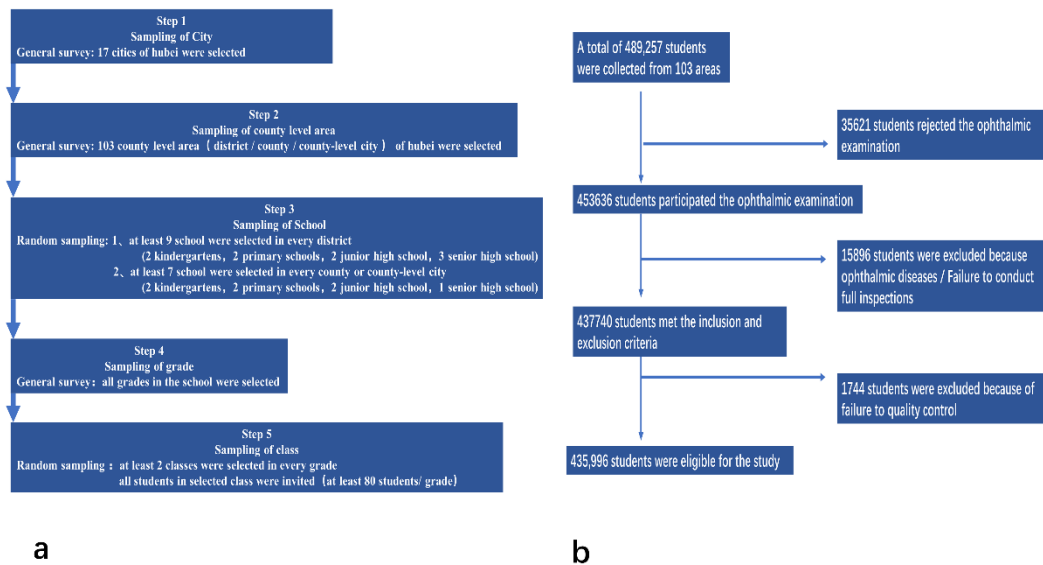

Figure S2 Sampling steps. (a) sampling methods; (b) flow diagram

- Sampling of cities: census, including 17 cities (103 county-level administrative districts) in Hubei
- Sampling of Schools: random sampling, the education and CDC departments of each survey site selected at least 2 kindergartens, 2 elementary schools, 2 junior high schools, and 1-3 senior high schools.
- Survey grades: census, all grades in each school were included.
- Survey Classes: random sampling, at least 2 classes per grade were selected. At least 80 people participated in each grade.

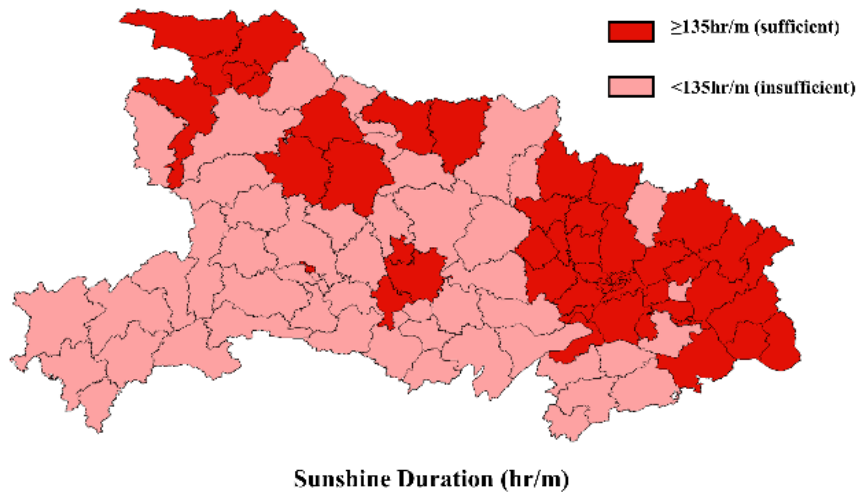

**Figure S3** Distribution of sunshine in 103 county-level administrative districts in Hubei Province. Red areas show areas with good sunshine ( $\geq 135\text{hr/m}$ ) Pink areas show areas with poor sunshine ( $< 135\text{hr/m}$ ).

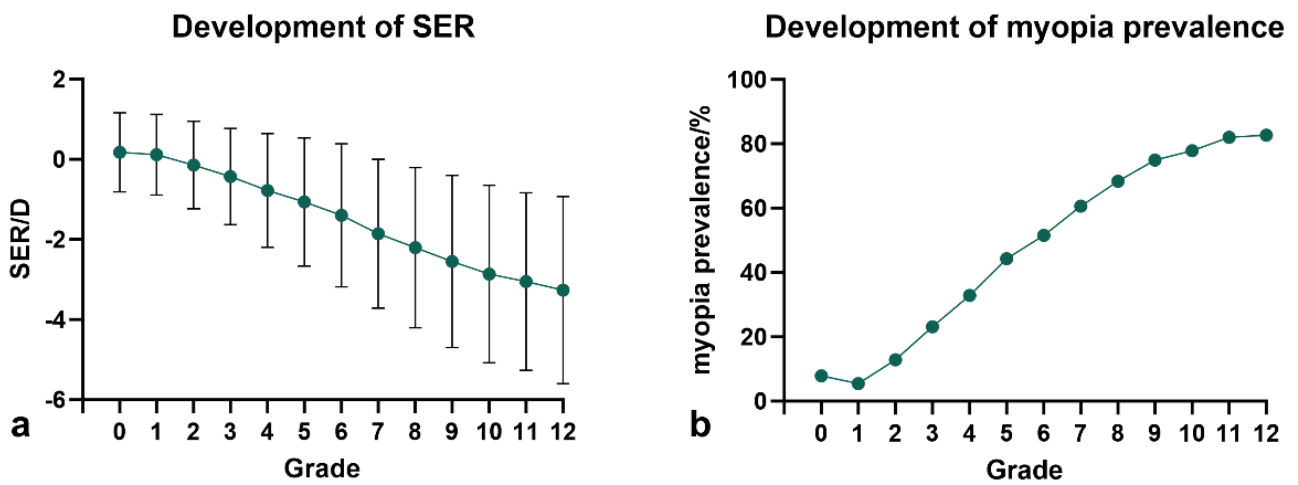

**Figure S4** Development of SER and prevalence by grade. **(a)** SER; **(b)** Prevalence.

**Table S1.** Geographic and social information of 103 survey sites

| Area         | City      | Type              | Long.<br>/E° | Lat.<br>/N° | Temp./<br>°C | Rain/<br>(mm/y) | Alt./<br>m | Per<br>Cpita<br>GDP<br>/RMB | Sunshine<br>Duration<br>(hr/m) |
|--------------|-----------|-------------------|--------------|-------------|--------------|-----------------|------------|-----------------------------|--------------------------------|
| Echeng       | Ezhou     | District          | 114.89       | 30.40       | 17           | 1282.8          | 28         | 100122                      | 140.6                          |
| Huarong      | Ezhou     | District          | 114.73       | 30.53       | 17           | 1315            | 29         | 135155                      | 143.1                          |
| Liangzihu    | Ezhou     | District          | 114.68       | 30.10       | 17           | 1330            | 53         | 64527                       | 138.2                          |
| Badong       | Enshi     | District          | 110.34       | 31.04       | 17.5         | 1500            | 263        | 31328                       | 100.8                          |
| Enshi        | Enshi     | County-level city | 109.48       | 30.29       | 15.5         | 1450            | 477        | 34116                       | 128.4                          |
| Hefeng       | Enshi     | County            | 110.03       | 29.89       | 15.5         | 1701            | 540        | 33063                       | 93.7                           |
| Jianshi      | Enshi     | County            | 109.72       | 30.60       | 15.5         | 1700            | 580        | 29309                       | 130.2                          |
| Laifeng      | Enshi     | County            | 109.41       | 29.49       | 15.8         | 1400            | 455        | 41003                       | 106.4                          |
| Lichuan      | Enshi     | County-level city | 108.91       | 30.21       | 12.9         | 1400            | 1083       | 21204                       | 126.3                          |
| Xianfeng     | Enshi     | County            | 109.14       | 29.67       | 16           | 1320            | 821        | 32163                       | 97.5                           |
| Xuanen       | Enshi     | County            | 109.49       | 29.99       | 15.8         | 1491.3          | 592        | 27447                       | 91.2                           |
| Hong'an      | Huanggang | County            | 114.62       | 31.29       | 15.7         | 1116.2          | 67         | 32160                       | 131.5                          |
| Huangmei     | Huanggang | County            | 115.94       | 30.07       | 16.8         | 1270            | 22         | 30053                       | 141.5                          |
| Huangzhou    | Huanggang | District          | 114.88       | 30.43       | 17.5         | 1233            | 22         | 55597                       | 132.9                          |
| Luotian      | Huanggang | County            | 115.40       | 30.78       | 16.4         | 1330            | 85         | 29656                       | 143.7                          |
| Macheng      | Huanggang | County-level city | 115.01       | 31.17       | 16.1         | 1291.5          | 56         | 33763                       | 146.2                          |
| Qichun       | Huanggang | County            | 115.44       | 30.23       | 16.8         | 1341.7          | 25         | 41051                       | 143.8                          |
| Tuanfeng     | Huanggang | County            | 114.87       | 30.64       | 16.8         | 1233            | 18         | 31275                       | 138.9                          |
| Wuxue        | Huanggang | County-level city | 115.56       | 29.84       | 16.8         | 1360            | 21         | 63208                       | 137.8                          |
| Xishui       | Huanggang | County            | 115.27       | 30.45       | 16.9         | 1300            | 17         | 34457                       | 146.7                          |
| Yingshan     | Huanggang | County            | 115.68       | 30.73       | 16.4         | 1403            | 133        | 32286                       | 146.0                          |
| Daye         | Huangshi  | County-level city | 114.98       | 30.10       | 16.9         | 1385.8          | 20         | 80701                       | 134.9                          |
| Huangshigang | Huangshi  | District          | 115.07       | 30.22       | 17           | 1382.6          | 32         | 86341                       | 139.2                          |
| Tieshan      | Huangshi  | District          | 114.90       | 30.21       | 17           | 1382.6          | 91         | 62519                       | 137.0                          |
| Xisaishan    | Huangshi  | District          | 115.11       | 30.20       | 17           | 1382.6          | 10         | 111603                      | 137.5                          |
| Xialu        | Huangshi  | District          | 114.96       | 30.17       | 16.9         | 1382.9          | 40         | 29454                       | 137.2                          |
| Yangxin      | Huangshi  | County            | 115.22       | 29.83       | 16.8         | 1389.6          | 10         | 32423                       | 135.6                          |
| Dongbao      | Jingmen   | District          | 112.20       | 31.05       | 16.1         | 977.4           | 101        | 136555                      | 134.6                          |
| Duodao       | Jingmen   | District          | 112.21       | 30.97       | 15.9         | 1089.68         | 126        | 79030                       | 137.1                          |
| Jingshan     | Jingmen   | County-level city | 113.12       | 31.02       | 16.3         | 1179            | 101        | 93663                       | 134.4                          |
| Shayang      | Jingmen   | County            | 112.59       | 30.71       | 16.1         | 1025.6          | 38         | 56883                       | 135.2                          |
| Zhongxiang   | Jingmen   | County-level city | 112.59       | 31.17       | 16.2         | 1200            | 62         | 60529                       | 134.4                          |
| Gong'an      | Jingzhou  | County            | 112.23       | 30.06       | 16.4         | 1125.2          | 29         | 37563                       | 133.2                          |
| Honghu       | Jingzhou  | County-level city | 113.48       | 29.83       | 16.6         | 1195.8          | 23         | 33248                       | 131.1                          |

|             |             |                   |        |       |       |        |      |        |       |
|-------------|-------------|-------------------|--------|-------|-------|--------|------|--------|-------|
| Jianli      | Jingzhou    | County-level city | 112.90 | 29.81 | 16.3  | 1200   | 28   | 30618  | 128.5 |
| Jiangling   | Jingzhou    | County            | 112.42 | 30.04 | 16.2  | 1000   | 30   | 35300  | 128.6 |
| Jingzhou    | Jingzhou    | District          | 112.19 | 30.35 | 16.5  | 1094.5 | 34   | 49777  | 136.9 |
| Shashi      | Jingzhou    | District          | 112.26 | 30.31 | 16.1  | 1141.5 | 31   | 121704 | 134.7 |
| Shishou     | Jingzhou    | County-level city | 112.43 | 29.72 | 16.3  | 1200   | 30   | 38687  | 125.4 |
| Songzi      | Jingzhou    | County-level city | 111.76 | 30.17 | 16.5  | 1175   | 61   | 45851  | 125.8 |
| Qianjiang   | Qianjiang   | County-level city | 112.90 | 30.40 | 16.1  | 1110   | 32   | 81338  | 101.0 |
| Shennongjia | Shennongjia | County-level city | 110.68 | 31.74 | 11.6  | 1219.9 | 1817 | 6877   | 130.2 |
| Danjiangkou | Shiyan      | County-level city | 111.51 | 32.54 | 16.1  | 796.8  | 114  | 70935  | 132.3 |
| Fang        | Shiyan      | County            | 110.73 | 32.04 | 14.2  | 914    | 441  | 25834  | 126.0 |
| Maojian     | Shiyan      | District          | 110.81 | 32.59 | 15.3  | 884.9  | 220  | 87707  | 136.1 |
| Xunxi       | Shiyan      | County            | 110.43 | 32.99 | 15.4  | 796    | 231  | 17090  | 143.2 |
| Xunyang     | Shiyan      | District          | 110.81 | 32.83 | 15.8  | 824    | 179  | 24871  | 141.8 |
| Zhangwan    | Shiyan      | District          | 110.77 | 32.65 | 15.25 | 1000.8 | 238  | 124462 | 140.7 |
| Zhushan     | Shiyan      | County            | 110.23 | 32.22 | 16.7  | 905.2  | 287  | 27385  | 139.7 |
| Zhuxi       | Shiyan      | County            | 109.72 | 32.32 | 14    | 1000   | 458  | 32524  | 130.9 |
| Zengdu      | Suizhou     | District          | 113.37 | 31.72 | 15.7  | 967    | 72   | 80828  | 132.3 |
| Guangshui   | Suizhou     | County-level city | 113.83 | 31.62 | 15.5  | 990    | 74   | 44410  | 136.1 |
| Sui         | Suizhou     | County            | 113.30 | 31.85 | 15.4  | 960    | 86   | 40417  | 133.0 |
| Tianmen     | Tianmen     | County-level city | 113.17 | 30.66 | 16.2  | 1101.4 | 26   | 49743  | 108.8 |
| Caidian     | Wuhan       | District          | 114.03 | 30.58 | 17.1  | 1302.4 | 26   | 97223  | 138.9 |
| Dongxihu    | Wuhan       | District          | 114.14 | 30.62 | 17.3  | 1107.3 | 28   | 162000 | 140.0 |
| Hannan      | Wuhan       | District          | 114.08 | 30.31 | 16.5  | 1179.4 | 16   | 127998 | 136.9 |
| Hanyang     | Wuhan       | District          | 114.22 | 30.55 | 16.6  | 1300   | 28   | 83488  | 140.1 |
| Hongshan    | Wuhan       | District          | 114.34 | 30.50 | 16.3  | 1170   | 21   | 61232  | 141.2 |
| Huangpi     | Wuhan       | District          | 114.38 | 30.88 | 17.3  | 1202   | 25   | 79048  | 143.8 |
| Jiang'an    | Wuhan       | District          | 114.28 | 30.59 | 16.3  | 1224.2 | 15   | 129192 | 141.1 |
| Jianghan    | Wuhan       | District          | 114.27 | 30.60 | 16    | 1300   | 27   | 209899 | 140.4 |
| Jiangxia    | Wuhan       | District          | 114.32 | 30.38 | 16.8  | 1347.7 | 21   | 111474 | 137.9 |
| Qiaokou     | Wuhan       | District          | 114.27 | 30.57 | 16.3  | 1300   | 31   | 129001 | 140.2 |
| Qingshan    | Wuhan       | District          | 114.39 | 30.64 | 16.8  | 1170   | 29   | 164360 | 140.7 |
| Wuchang     | Wuhan       | District          | 114.32 | 30.55 | 16.6  | 1269   | 18   | 136621 | 140.2 |
| Xinzhou     | Wuhan       | District          | 114.80 | 30.84 | 16.7  | 1333.4 | 31   | 74787  | 147.8 |
| Xiantao     | Xiantao     | County-level city | 113.45 | 30.36 | 17    | 1238.6 | 24   | 77829  | 100.2 |
| Chibi       | Xianning    | County-level city | 113.90 | 29.72 | 16.9  | 1429   | 39   | 81382  | 129.9 |
| Chongyang   | Xianning    | County            | 114.04 | 29.56 | 16.6  | 1395   | 56   | 32792  | 133.1 |
| Jiayu       | Xianning    | County            | 113.94 | 29.97 | 17.3  | 1431   | 30   | 83331  | 146.4 |
| Tongcheng   | Xianning    | County            | 113.82 | 29.25 | 17.1  | 1556   | 101  | 35180  | 132.4 |
| Tongshan    | Xianning    | County            | 114.48 | 29.61 | 16.3  | 1500   | 143  | 34137  | 133.5 |
| Xian'an     | Xianning    | District          | 114.30 | 29.85 | 17.2  | 1600   | 61   | 62058  | 131.4 |

|            |           |                   |        |       |      |        |     |        |       |
|------------|-----------|-------------------|--------|-------|------|--------|-----|--------|-------|
| Baokang    | Xiangyang | County            | 111.26 | 31.88 | 15   | 934.6  | 437 | 61475  | 136.4 |
| Fancheng   | Xiangyang | District          | 112.14 | 32.04 | 15.5 | 878.3  | 69  | 85864  | 126.6 |
| Gucheng    | Xiangyang | County            | 111.65 | 32.26 | 15.4 | 1000   | 83  | 72456  | 138.7 |
| Laohekou   | Xiangyang | County-level city | 111.68 | 32.36 | 15.3 | 838.1  | 93  | 83308  | 134.8 |
| Nanzhang   | Xiangyang | County            | 111.84 | 31.77 | 16   | 940    | 105 | 55324  | 137.1 |
| Xiangcheng | Xiangyang | District          | 112.13 | 32.01 | 15.5 | 960    | 75  | 78808  | 126.5 |
| Xiangzhou  | Xiangyang | District          | 112.21 | 32.09 | 15.5 | 878.3  | 74  | 85894  | 140.0 |
| Yicheng    | Xiangyang | County-level city | 112.26 | 31.72 | 15.5 | 900    | 54  | 71010  | 131.1 |
| Zaoyang    | Xiangyang | County-level city | 112.77 | 32.13 | 15.5 | 840    | 115 | 58050  | 137.8 |
| Anlu       | Xiaogan   | County-level city | 113.69 | 31.26 | 15.8 | 1117   | 52  | 45525  | 144.7 |
| Dawu       | Xiaogan   | County            | 114.13 | 31.56 | 15.4 | 1114.9 | 80  | 31704  | 143.1 |
| Hanchuan   | Xiaogan   | County-level city | 113.84 | 30.66 | 16.2 | 1224.9 | 25  | 55662  | 139.8 |
| Xiaochang  | Xiaogan   | County            | 114.00 | 31.26 | 16.1 | 1130   | 60  | 26423  | 141.1 |
| Xiaonan    | Xiaogan   | District          | 113.91 | 30.92 | 16.2 | 1146   | 36  | 36617  | 136.0 |
| Yingcheng  | Xiaogan   | County-level city | 113.56 | 30.94 | 16   | 1033   | 27  | 49882  | 141.3 |
| Yunmeng    | Xiaogan   | County            | 113.75 | 31.02 | 16   | 1074.5 | 29  | 51475  | 140.4 |
| Dangyang   | Yichang   | County-level city | 111.79 | 30.82 | 16.6 | 992.1  | 66  | 129049 | 117.1 |
| Dianjun    | Yichang   | District          | 111.27 | 30.69 | 16.8 | 1213.6 | 59  | 66467  | 120.4 |
| Wufeng     | Yichang   | County            | 110.67 | 30.20 | 15.3 | 1652   | 351 | 33072  | 108.1 |
| Wujiagang  | Yichang   | District          | 111.36 | 30.64 | 16.5 | 1198.1 | 63  | 92669  | 121.3 |
| Xiling     | Yichang   | District          | 111.29 | 30.71 | 16.8 | 1164.1 | 87  | 75267  | 135.5 |
| Xiaoting   | Yichang   | District          | 111.43 | 30.53 | 17.7 | 1102.5 | 108 | 206030 | 119.8 |
| Xingshan   | Yichang   | County            | 110.75 | 31.35 | 15.3 | 1050   | 232 | 83305  | 123.8 |
| Yiling     | Yichang   | District          | 111.33 | 30.77 | 16.7 | 1173   | 84  | 158677 | 120.7 |
| Yidu       | Yichang   | County-level city | 111.45 | 30.38 | 16.7 | 1235.4 | 61  | 194121 | 106.5 |
| Yuan'an    | Yichang   | County            | 111.64 | 31.06 | 16   | 1050   | 114 | 122738 | 122.5 |
| Changyang  | Yichang   | County            | 111.21 | 30.47 | 16.5 | 1366.2 | 141 | 35411  | 115.3 |
| Zhijiang   | Yichang   | County-level city | 111.76 | 30.43 | 16.5 | 1041.8 | 44  | 127143 | 124.8 |
| Zigui      | Yichang   | County            | 110.98 | 30.83 | 16.8 | 1811.6 | 141 | 38773  | 120.6 |

**Table S2** Demographic information

| Variables                                               | N                                                              | Mean                            | SD   |
|---------------------------------------------------------|----------------------------------------------------------------|---------------------------------|------|
| Age                                                     | 435996                                                         | 12.16                           | 3.74 |
| Gender (Male/Female)                                    |                                                                | 232527(53.33%) / 203469(46.67%) |      |
| Spherical Equivalent Refraction (Diopters)              | 435996                                                         | -1.58                           | 2.14 |
| Education levels (kindergarten/primary/junior/senior)   | 24461(5.61%) / 195476(44.84%) / 100068(22.95%) / 115791(26.56) |                                 |      |
| Myopia prevalences (kindergarten/primary/junior/senior) | 7.9%/28.9%/67.8%/80.7%                                         |                                 |      |
| Grade                                                   | 435996                                                         | 6.32                            | 3.68 |

**Table S3** Geographic division of Hubei

| Area       | City (N=17)                                                      |
|------------|------------------------------------------------------------------|
| Northeast  | Wuhan, Xiaogan and Huanggang.                                    |
| Southeast  | Ezhou, Huangshi, Xianning, Jingzhou, Xiantao, Tianmen, Qianjiang |
| Northwest: | Suizhou, Jingmen, Xiangyang, Shiyan, Shennongjia                 |
| Southwest  | Yichang City, Enshi                                              |

**Table S4** Comparison of Variables associated with the establishment of myopia

| Variables                      | Myopia          | Non-myopia      | P value <sup>a</sup> |
|--------------------------------|-----------------|-----------------|----------------------|
| Sample/N                       | 219749          | 216247          |                      |
| Age (year)                     | 14.12±2.87      | 10.16±3.44      | <.0001               |
| Gender (Male/Female)           | 50.90% / 49.10% | 55.80% / 44.20% | <0.001               |
| Grade                          | 8.30±2.87       | 4.32±3.31       | <0.001               |
| Average GDP (RMB)              | 71646           | 75128           | <0.001               |
| Living area (district / other) | 33.0% / 67.0%   | 29.4% / 70.6%   | <0.001               |
| SER (D)                        | -3.12±1.81      | -0.02±1.01      | <0.001               |
| Sunshine duration (hr/m)       | 131.97±11.23    | 132.41±11.07    | <0.001               |
| Sunshine duration (≥135hr/m)   | 52.7%           | 56.7%           | <0.001               |
| Longitude (°)                  | 112.70±1.79     | 112.94±1.72     | <0.001               |
| Latitude (°)                   | 30.87±0.87      | 30.77±0.82      | <0.001               |
| Altitude (m)                   | 137.84±211.78   | 119.52±201.99   | <0.001               |
| Temperature (°C)               | 16.19±0.87      | 16.27±0.81      | <0.001               |
| Precipitation (mm/y)           | 1194.03±212.22  | 1216.04±201.67  | <0.001               |

<sup>a</sup> For categorical variables, a  $\chi^2$  test was used; For continuous variables, a t test was used.

**Table S5** Comparison of SD under different geographic conditions

| <b>Factors</b>          | <b>Groups</b> | <b>Sunlight duration hr/m<br/>(median)</b> | <b>K-W</b> | <b>P value<sup>a</sup></b> |
|-------------------------|---------------|--------------------------------------------|------------|----------------------------|
| <b>longitude/E°</b>     | W:108.5~111   | 126.30                                     | 44.14      | <0.001                     |
|                         | C:111~113.5   | 131.10                                     |            |                            |
|                         | E:113.5~116   | 140.08                                     |            |                            |
| <b>latitude/N°</b>      | N:31.6~33.0   | 132.42                                     | 4.06       | 0.132                      |
|                         | C:30.3~31.6   | 136.91                                     |            |                            |
|                         | S:29~30.3     | 136.08                                     |            |                            |
| <b>temperature/°C</b>   | <16           | 131.91                                     | 1.96       | 0.375                      |
|                         | 16~17         | 136.46                                     |            |                            |
|                         | >17           | 132.88                                     |            |                            |
| <b>altitude/m</b>       | <200          | 136.08                                     | 7.08       | 0.028                      |
|                         | 200~500       | 129.65                                     |            |                            |
|                         | >500          | 111.90                                     |            |                            |
| <b>precipitation/mm</b> | <1000         | 134.80                                     | 6.47       | 0.0390                     |
|                         | 1000~1500     | 136.46                                     |            |                            |
|                         | >1500         | 125.43                                     |            |                            |

<sup>a</sup>P values were calculated using Kruskal-Wallis test.

**Table S6** Global spatial analysis of geographic data and SD

| <b>Factors</b>       | <b>Global Bivariate Moran's I<br/>(Sunlight duration-factors)</b> | <b>P value<sup>a</sup></b> |
|----------------------|-------------------------------------------------------------------|----------------------------|
| <b>longitude</b>     | 0.571                                                             | <0.001                     |
| <b>latitude</b>      | 0.191                                                             | <0.001                     |
| <b>temperature</b>   | 0.126                                                             | 0.012                      |
| <b>altitude</b>      | -0.334                                                            | <0.001                     |
| <b>precipitation</b> | -0.204                                                            | <0.001                     |

<sup>a</sup>P values were calculated using Z test.
